# Supplementary material
Source: HighWire-hosted journal article supplement (http://hw-f5-jim.highwire.org/highwire/filestream/139185/field_highwire_adjunct_files/4/AFMR_Workshop_2021_69_6.pdf)

# AFMR

American Federation  
for Medical Research

Develop and mentor tomorrow's leaders in medical research

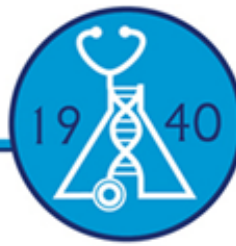

## Virtual Education Series

### CAREER DEVELOPMENT WEBINAR RECORDINGS AVAILABLE

FREE REGISTRATION REQUIRED AT [AFMR.ORG/VIRUTAL/EDUCATION](http://AFMR.ORG/VIRUTAL/EDUCATION)

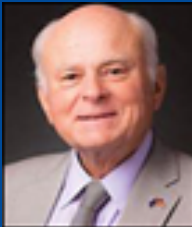

### How To Write A Manuscript Workshops Parts I & II

Presented Tuesday, September 29, 2020 &  
Tuesday, June 22, 2021

by Richard McCallum, MD, Editor-in-Chief, *Journal of Investigative Medicine*

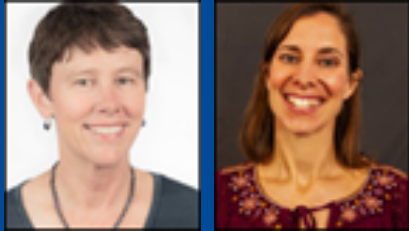

### Building A Peer Mentorship Program

Presented Tuesday, June 8, 2021

by Jane Reusch, MD & Kristen Nadeau, MD

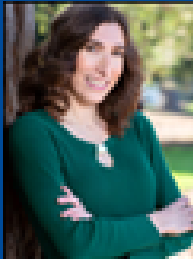

### Writing In The Sciences

Presented Tuesday, May 25, 2021

by Kristin Sainani, PhD

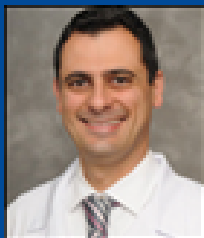

### Scientists On Social Media: Claiming The Digital Space

Presented Tuesday, May 11, 2021

by Armand Krikorian, MD, AFMR Past-President

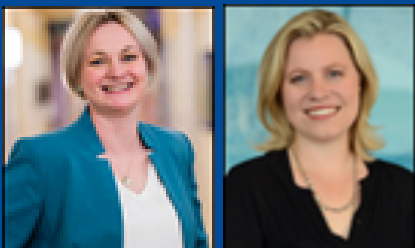

### Becoming a physician scientist: How to incorporate research into your medical training and career

Presented Monday December 7, 2020

by Melanie Cree-Green, MD, PhD &  
Shanlee Davis, MD, MSCS

[www.afmr.org](http://www.afmr.org)

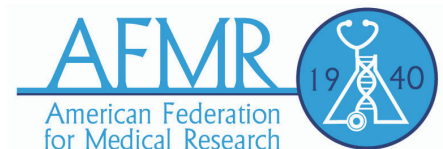

Supplement: AFMR_Workshop_2021_69_6.pdf [file AFMR_Workshop_2021_69_6.pdf]
